# Supplementary material for: c-Abl regulates YAPY357 phosphorylation to activate endothelial atherogenic responses to disturbed flow
Source: JCI journal article supplement (doi:10.1172/jci122440), 2019-01-10
Supplement: sd1 [file 1]

**Supplemental to ‘c-Abl regulates YAP<sup>Y357</sup> phosphorylation to activate endothelial atherogenic responses to disturbed flow’**

Bochuan Li<sup>\*</sup>, Jinlong He<sup>\*</sup>, Huizhen Lv, Yajin Liu, Xue Lv, Chenghu Zhang, Yi Zhu<sup>#</sup>, Ding Ai<sup>#</sup>

Tianjin Key Laboratory of Metabolic Diseases; Key Laboratory of Immune Microenvironment and Disease (Ministry of Education); Collaborative Innovation Center of Tianjin for Medical Epigenetics and Department of Physiology and Pathophysiology, Tianjin Medical University, Tianjin, 300070, China;

<sup>\*</sup>These two authors contributed equally to this study.

<sup>#</sup>To whom correspondence may be addressed:

Yi Zhu

Department of Physiology and Pathophysiology, Tianjin Medical University, 22 Qixiangtai Rd, Tianjin, China, 300070.

Tel: +86-22-83336665

E-mail: [zhuyi@tmu.edu.cn](mailto:zhuyi@tmu.edu.cn)

or

Ding Ai

Department of Physiology and Pathophysiology, Tianjin Medical University, 22 Qixiangtai Rd, Tianjin, China, 300070.

Tel: +86-22-83336591

E-mail: [edin2000cn@gmail.com](mailto:edin2000cn@gmail.com)

# Supplementary Figures and Figure Legends

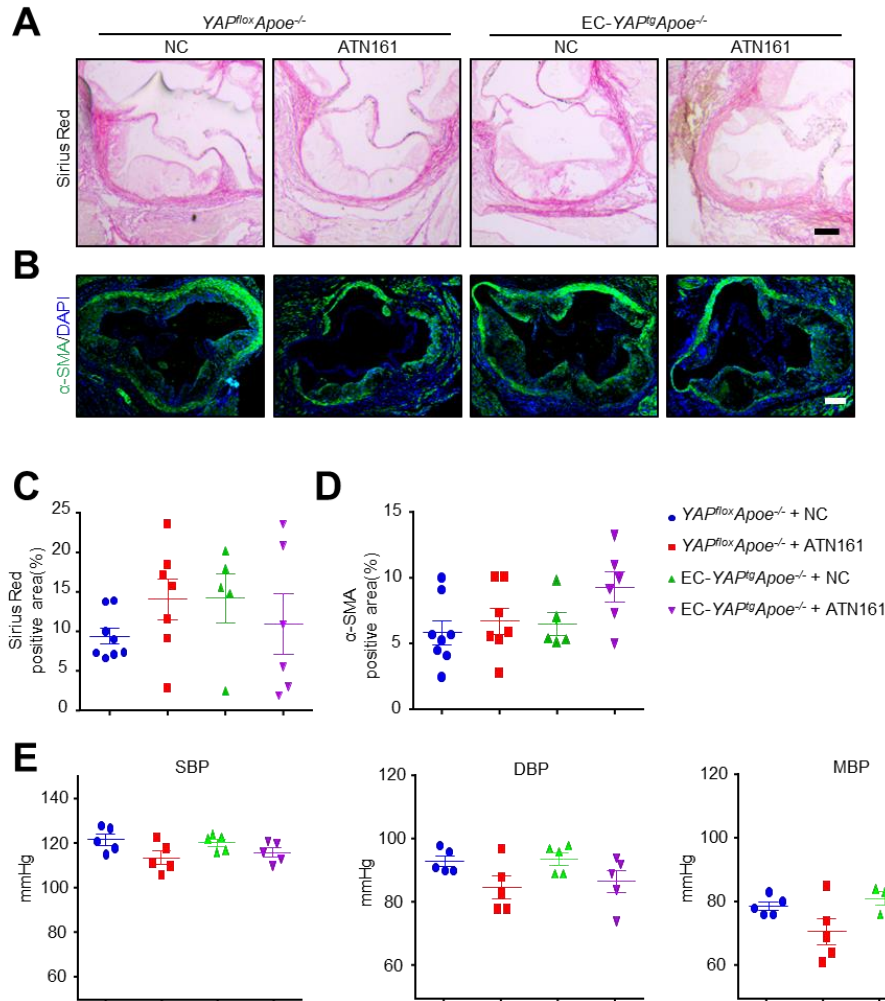

**Supplementary Figure 1.** EC-YAP<sup>tg</sup>Apoe<sup>-/-</sup> and YAP<sup>fllox</sup>Apoe<sup>-/-</sup> mice were fed a Western diet for 4 weeks, during which mice were intraperitoneally injected with scramble peptide (NC) or ATN161 (100 mg/kg) every 3 days. Aortic roots of mice were stained with Sirius red (**A**) and underwent immunofluorescence staining for SMA (smooth muscle cell marker, green) (**B**). (**C-D**) Quantification of collagen fiber (Sirius red) and α-SMA-positive area staining in plaque. Data are mean ± SEM. YAP<sup>fllox</sup>Apoe<sup>-/-</sup> + NC (n=8), YAP<sup>fllox</sup>Apoe<sup>-/-</sup> + ATN161 (n=7), EC-YAP<sup>tg</sup>Apoe<sup>-/-</sup> + NC (n=5), EC-YAP<sup>tg</sup>Apoe<sup>-/-</sup> + ATN161 (n=6). Scale bar, 100 μm. (**E**) Noninvasive tail-cuff monitoring of systolic blood pressure (SBP), diastolic blood pressure (DBP) and mean blood pressure (MBP) of mice. Data are mean ± SEM. n=5.

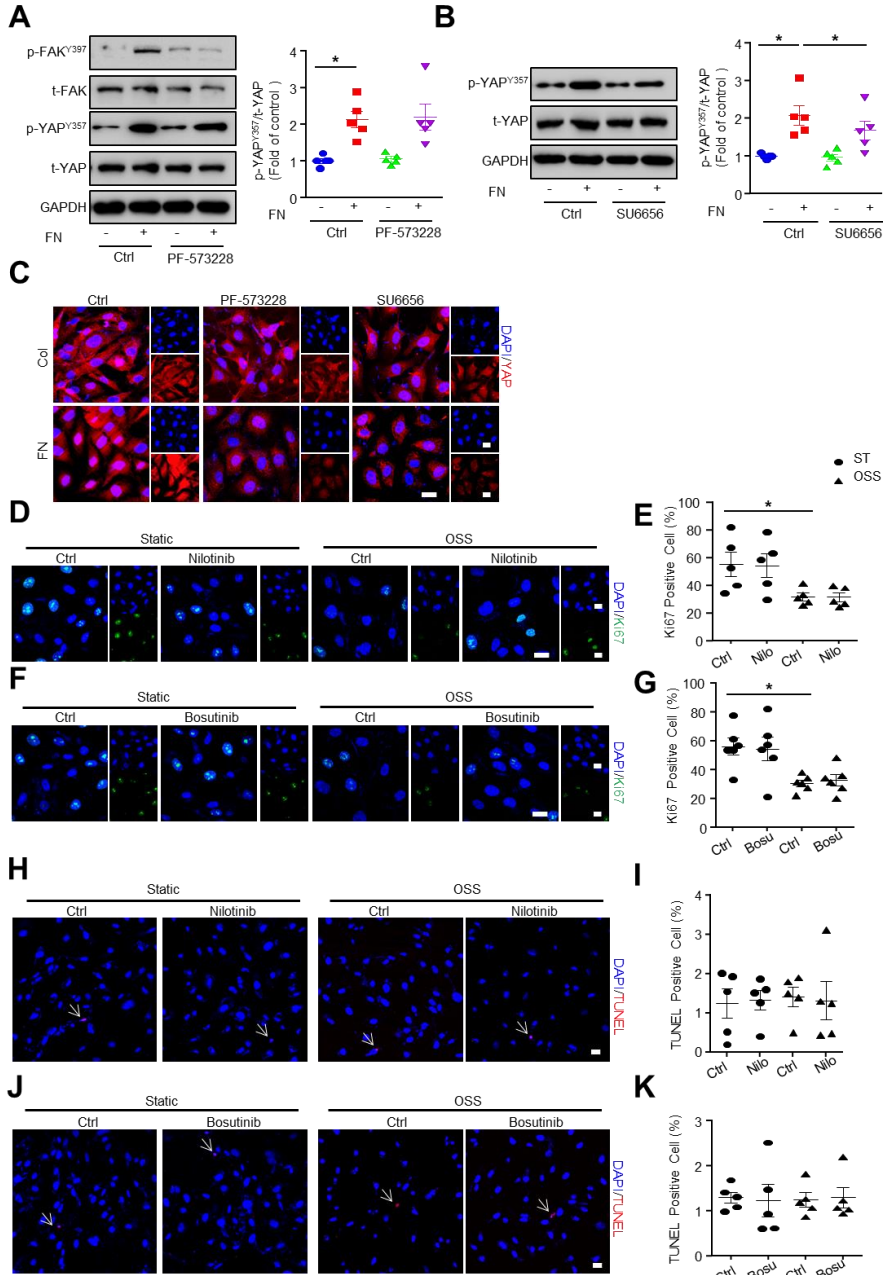

**Supplementary Figure 2.** HUVECs were seeded on dishes coated with fibronectin (FN) or collagen and cultured for 6 hr with or without inhibitors (10  $\mu$ mol/L), as indicated. **(A-B)** Western blot analysis of expression of indicated proteins and quantification of ratio of p-YAP<sup>Y357</sup> to t-YAP. Data are mean  $\pm$  SEM, \*p < 0.05 (two-way ANOVA with Bonferroni multiple comparison post-test). n=5. **(C)** Immunofluorescence staining of YAP (red) or DAPI (blue). Representative images are shown. n=6. Scale bar, 20  $\mu$ m. **(D-G)** HUVECs were exposed to oscillatory shear stress (OSS) or static treatment (ST) for 6 hr with or without inhibitors (10  $\mu$ mol/L) as indicated. Quantification of the percentage of Ki67-positive cells. Data are mean  $\pm$  SEM, \*p < 0.05 (two-way ANOVA with Bonferroni multiple comparison post-test). (D-E), n=5. (F-G), n=6. Scale bar, 100  $\mu$ m. **(H-K)** HUVECs were exposed to OSS or ST for 6 hr with or without inhibitors (10  $\mu$ mol/L) as indicated. Quantification of the percentage of TUNEL-positive cells. White arrows indicate TUNEL-positive cells. Data are mean  $\pm$  SEM. n=5. Scale bar, 40  $\mu$ m.

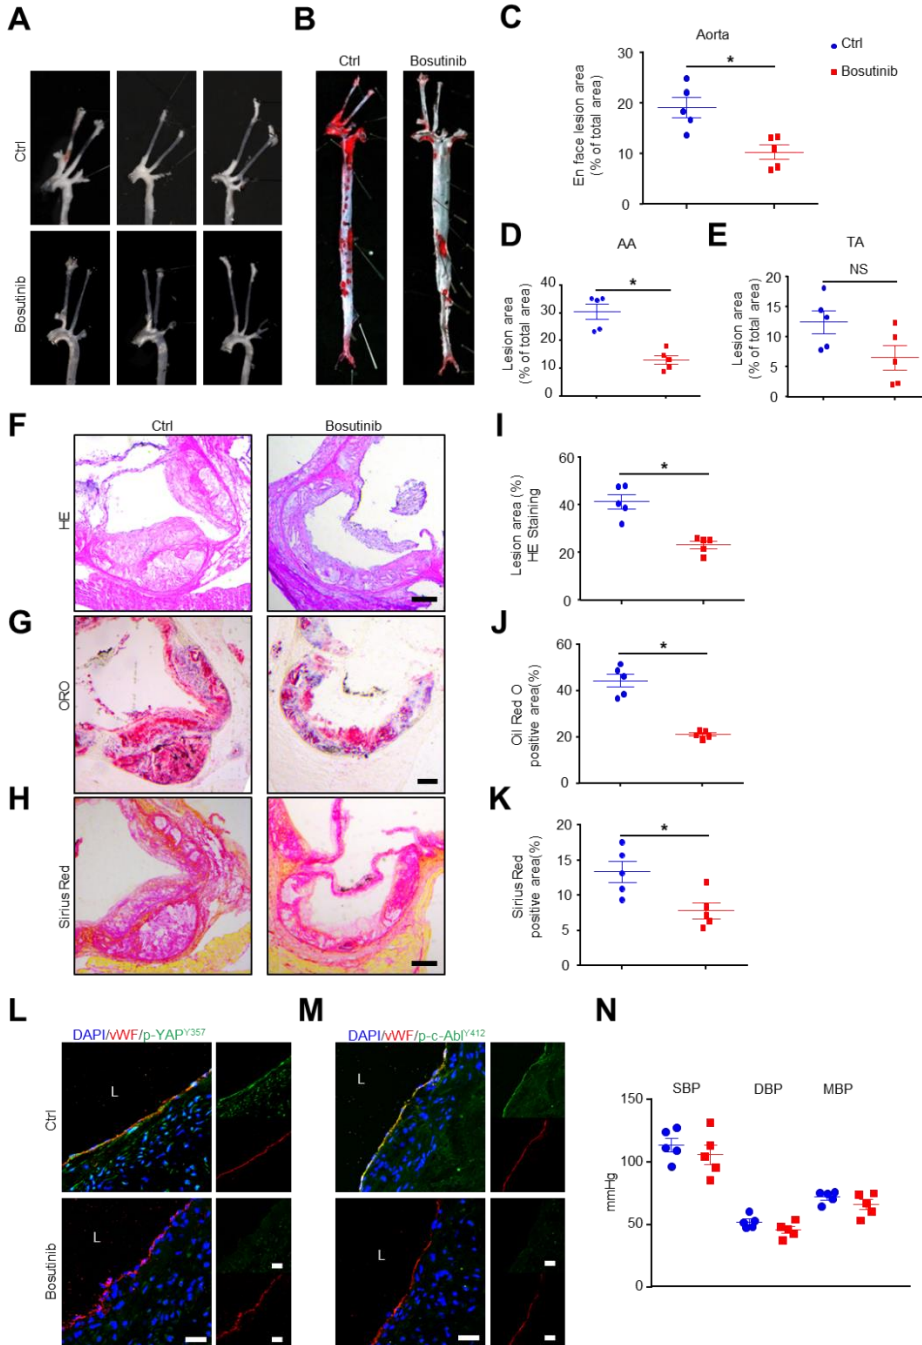

**Supplementary Figure 3.** *Apoe*<sup>-/-</sup> mice were injected with bosutinib (30 mg/kg) every 3 days and fed a Western diet for 12 weeks. (A-B) Representative gross and Oil-red O staining of aortas. n=5. (C-E) Quantification of lesion area in (B). AA, aortic arch; TA, thoracic aorta; NS, not significant. Data are mean ± SEM, \*p<0.05 (Student's *t* test). n=5. Aortic roots were sectioned and underwent HE (F), Oil-red O (G) and Sirius red (H) staining. n=5. Scale bar, 100 µm. (I-K) Quantification of lesion area or positive area staining. Data are mean ± SEM, \*p<0.05 (Student's *t* test). n=5. (L-M) Representative immunofluorescence staining of p-YAP<sup>Y357</sup> or p-c-Abi<sup>Y412</sup> in aortic roots. n=5. Scale bar, 30 µm. L, lumen. (N) Noninvasive tail-cuff monitoring of systolic blood pressure (SBP), diastolic blood pressure (DBP) and mean blood pressure (MBP) of mice. Data are mean ± SEM. n=5.

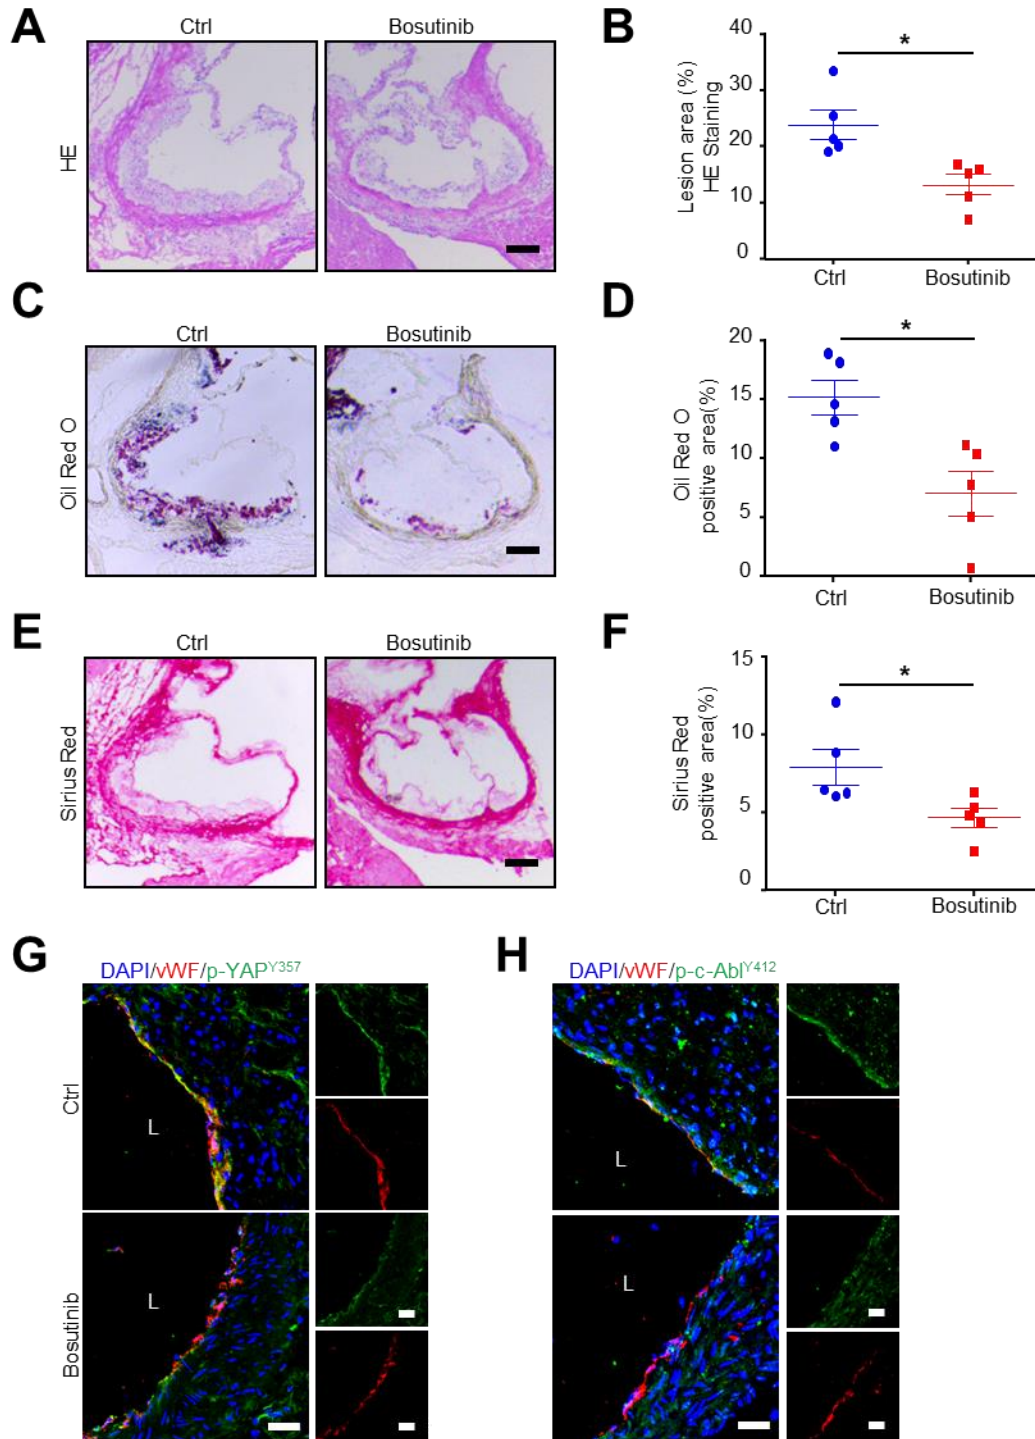

**Supplementary Figure 4.** *Apoe*<sup>-/-</sup> mice were injected with bosutinib (30 mg/kg) every 3 days for 5 weeks and were fed a Western diet for 4 weeks from the second week. Aortic roots were sectioned and underwent HE (A), Oil-red O (B) and Sirius red (C) staining. n=5. Scale bar, 100  $\mu$ m. (D-F) Lesion area or positive area staining was quantified. Data are mean  $\pm$  SEM, \*p<0.05 (Student's *t* test). n=5. (G-H) Representative immunofluorescence staining of p-YAP<sup>Y357</sup> or p-c-Abl<sup>Y412</sup> in aortic roots. n=5. Scale bar, 30  $\mu$ m. L, lumen.
